# Supplementary material for: Growth of HIV-exposed uninfected, compared with HIV-unexposed, Zambian children: a longitudinal analysis from infancy to school age
Source: Springer Nature journal article supplement (doi:10.1186/s12887-017-0828-6), 2017-03-16
Supplement: MOESM1 [file 12150068]

**Table S1: Difference<sup>a</sup> in mean Z-scores at later time points by maternal HIV status [95% CI] as estimated by regression models adjusted for socioeconomic status, maternal education and breast-feeding duration**

|             | Unadjusted                                                     |                |               | Adjusted <sup>b</sup> |                |               |
|-------------|----------------------------------------------------------------|----------------|---------------|-----------------------|----------------|---------------|
|             | Weight-for-age                                                 | Height-for-age | BMI-for-age   | Weight-for-age        | Height-for-age | BMI-for-age   |
| Age (years) | Breast Feeding and Postpartum Health (BFPH) study              |                |               |                       |                |               |
| ~2.7        | 0.24                                                           | 0.69           | -0.24         | 0.12                  | 0.60           | -0.33         |
| N=205       | [-0.13, 0.61]                                                  | [0.12, 1.27]   | [-0.79, 0.31] | [-0.26, 0.51]         | [-0.02, 1.21]  | [-0.92, 0.26] |
|             | P=0.20                                                         | P=0.02         | P=0.39        | P=0.52                | P=0.06         | P=0.27        |
| ~11.6       | -                                                              | 0.22           | -0.11         | -                     | 0.19           | -0.07         |
| N=66        |                                                                | [-0.28, 0.71]  | [-0.69, 0.47] |                       | [-0.37, 0.75]  | [-0.79, 0.65] |
|             |                                                                | P=0.38         | P=0.70        |                       | P=0.51         | P=0.84        |
|             | Chilenje Infant Growth, Nutrition and Infection Study (CIGNIS) |                |               |                       |                |               |
| ~7.5        | 0.27                                                           | 0.01           | 0.40          | 0.24                  | 0.14           | 0.51          |
| N=326       | [-0.02, 0.56]                                                  | [-0.23, 0.24]  | [0.09, 0.71]  | [-0.14, 0.62]         | [-0.45, 0.17]  | [0.09, 0.92]  |
|             | P=0.06                                                         | P=0.96         | P=0.01        | P=0.21                | P=0.38         | P=0.02        |

<sup>a</sup>HUU mean Z-scores minus HEU mean Z-scores.

<sup>b</sup>BFPH adjusted for maternal education (primary, secondary, tertiary), housing density (high, medium, low) and breastfeeding duration (<18 months, at least 18 months) and CIGNIS adjusted for maternal education (primary or less, secondary, tertiary), socioeconomic group (low, middle, high) and breastfeeding duration (<12 months, at least 12 months).
